# Supplementary material for: Carbon-coated WS2 nanosheets supported on carbon nanofibers for high-rate potassium-ion capacitors
Source: Royal Society of Chemistry journal article supplement (doi:10.1039/d1ee00193k), 2021-01-01
Supplement: d1ee00193k1.pdf [file d1ee00193k1.pdf]

## Supporting Information

### **Carbon-coated WS<sub>2</sub> Nanosheets Supported on Carbon Nanofibers for High-rate**

#### **Potassium-ion Capacitors**

Shitao Geng,<sup>a</sup> Tong Zhou,<sup>\*a</sup> Minyu Jia,<sup>a</sup> Xiangyan Shen,<sup>b</sup> Peibo Gao,<sup>a</sup> Shuang Tian,<sup>a</sup>  
Pengfei Zhou,<sup>b</sup> Bo Liu,<sup>a</sup> Jin Zhou,<sup>\*b</sup> Shuping Zhuo,<sup>b</sup> and Feng Li<sup>\*c</sup>

<sup>a</sup> School of Physics and Optoelectronic Engineering, Shandong University of Technology, Zibo 255049, China

E-mails: zhoutong@sdut.edu.cn

<sup>b</sup> School of Chemistry and Chemical Engineering, Shandong University of Technology, Zibo 255049, China

E-mails: zhoujin@sdut.edu.cn

<sup>c</sup> Shenyang National Laboratory for Materials Science, Institute of Metal Research, Chinese Academy of Sciences, Shenyang 110016, China

E-mail: fli@imr.ac.cn

## Experiment Section

**Preparation of CNFs:** Typically, 11.2 g of polyacrylonitrile (PAN,  $M_w = 150\ 000$ , Sigma-Aldrich Co., Ltd.) was added into 20 mL of N, N-dimethylformamide (DMF, 99.5%, Sinopharm Chemical Reagent Co., Ltd). The mixture was stirred for 12 h at room temperature until the solution became transparent. 10 mL stainless steel syringe (inner diameter 0.71 mm) was used to load the precursor solution. In the electrospinning process, the flow rate was controlled at about  $0.05\text{ mL h}^{-1}$ , and the indoor humidity was controlled below 25%. The electrospun nanofibers drew out under electrostatic field originating from 16 kV of positive voltage on the needle and 3 kV of negative voltage on the aluminum foil collector. Afterward, the pre-oxidized PAN nanofiber was obtained by heating to  $260\text{ }^{\circ}\text{C}$  for 2 h. Finally, the CNFs membrane was prepared via carbonization at  $800\text{ }^{\circ}\text{C}$  for 2 h in tube furnace under Ar atmosphere.

**Preparation of O-WS<sub>2</sub>@CNFs:** 120 mg of ammonium tungsten sulfide ((NH<sub>4</sub>)<sub>2</sub>WS<sub>4</sub>,  $\geq 99.9\%$ , Sigma-Aldrich Co., Ltd.) was dissolved in 35 mL of DMF. The green reaction solution and 0.3 mg of CNFs (area of  $900\text{ mm}^2$ ) were transferred to Teflon-lined autoclave and heated at  $200\text{ }^{\circ}\text{C}$  for 16 h. The product was washed repetitiously with deionized water and ethanol. Finally, the O-WS<sub>2</sub>@CNFs was obtained after dried at  $60\text{ }^{\circ}\text{C}$  overnight.

**Preparation of WS<sub>2</sub>@CNFs:** The O-WS<sub>2</sub>@CNFs and sulfur powder ( $\geq 99.95\%$ , Sigma-Aldrich Co., Ltd.) was placed in the middle and the upstream part of the tube furnace, respectively. Ar with the flow rate of 20 sccm was continuous throughout the whole process of vulcanization. The tube furnace was heated to  $800\text{ }^{\circ}\text{C}$  at heating rate

of 5 °C min<sup>-1</sup> and maintained at 800 °C for 2 h. After cooled back to room temperature, the WS<sub>2</sub>@CNFs was finally obtained.

**Preparation of C-WS<sub>2</sub>@CNFs:** The WS<sub>2</sub>@CNFs was immersed in 100 mL of Tris-buffered solution (10 mM, pH 8.5). 200 mg of dopamine (98%, Aladdin Co., Ltd.) was added to the solution with stirring for 5 h to obtain the PDA-coating WS<sub>2</sub>@CNFs. Afterward, the composite was washed several times with deionized water, followed by drying for 12 h at 60 °C. Finally, the C-WS<sub>2</sub>@CNFs was carbonized in tube furnace under Ar atmosphere at 550 °C for 3.5 h to obtain the C-WS<sub>2</sub>@CNFs.

**Preparation of ACNFs:** First, the CNFs were immersed in 4.0 M KOH solution and evacuated for 20 min to ensure that the KOH solution was able to infiltrate the CNFs fully, and continue to soak for 24 h in air atmosphere. After taking it out, it was dried at 80 °C for 2 h. The obtained product of KOH/CNFs was placed in tube furnace for activation treatment. The furnace temperature was heated up to 800 °C for 2 h with heating rate of 5 °C min<sup>-1</sup>. The obtained product was washed with 1.0 M HCl solution, followed by washing with a large amount of de-ionized water, and finally dried at 80 °C for 12 h to obtain ACNFs.

**Material Characteristics:** SEM and TEM images of samples were taken by field emission scanning electron microscope (FESEM, HITACHI, SU8010) and transmission electron microscope (TEM, FEI Tecnai G2 F20 S-TWIN). X-ray powder diffraction (XRD) patterns were recorded from Bruker D8 Advance powder X-ray diffractometer with Cu Ka ( $\lambda = 0.15406$  nm). Raman spectra were collected from a LabRAM HR evolution spectrometer under the excitation of 532 nm laser. For the *in*

*situ* Raman test, the ECC-Opto-Std test cell (EL-Cell GmbH) was used for the assembly of the K half cell. BET surface area and pore size distribution were evaluated by N<sub>2</sub> adsorption/desorption analyzer (ASAP 2420, Micrometrics). X-ray photoelectron spectroscopy was measured by X-ray photoelectron spectroscopy (XPS, Thermo ESCALAB 250XI). Thermogravimetric analysis (TGA) was performed using Perkin-Elmer TGA 4000 at rate of 5 °C min<sup>-1</sup> at 30-800 °C.

**Electrochemical Measurement:** The as-prepared O-WS<sub>2</sub>@CNFs, WS<sub>2</sub>@CNFs, and C-WS<sub>2</sub>@CNFs membranes were cut into identical pieces and used directly as the working electrodes. All electrodes with an areal density of about 1.0 mg cm<sup>-2</sup> were assembled into CR2032-type cells under Ar glove box (H<sub>2</sub>O and O<sub>2</sub> < 0.01 ppm, Mbraun, Unilab). K foil was used as the anode and 1.0 M KFSI in EC: DMC = 1:1 vol% was used as the electrolyte. Galvanostatic charge/discharge tests were performed with the Land CT2001A battery testing system. Cyclic voltammetry and electrochemical impedance spectroscopy were carried out on an electrochemical workstation (IVIUM technology, nSTAT). The current density and the capacity are based on the total mass of the electrodes.

**GITT Measurement:** Measurements of GITT profiles were made with pulse current at 0.05 A g<sup>-1</sup> for 30 min between rest intervals for 1 h. The diffusivity coefficient can be estimated according to Fick's second law as follows:

$$D_k^+ = \frac{4}{\pi\tau} \left( \frac{m_B V_M}{M_B S} \right)^2 \left( \frac{\Delta E_S}{\Delta E_t} \right)^2$$

where  $m_B$  and  $M_B$  are the effective mass and molar mass of the electrode material, respectively.  $V_M$  is the molar volume,  $S$  is the surface area of the electrode;  $\Delta E_S$  is the

voltage change between the initial and steady state,  $\Delta E_t$  is the constant current discharge/charge potential change.

**DFT Calculation Method:** First-principle calculations were performed by the density functional theory (DFT) using the Vienna Ab-initio Simulation Package (VASP) package [*Comput. Mater. Sci.* 1996, 6, 15-50]. The generalized gradient approximation (GGA) with the Perdew- Burke-Ernzerhof (PBE) functional was used to describe the electronic exchange and correlation effects [*Phys. Rev. Lett.* 1996, 77, 3865-3868]. Uniform G-centered k-points meshes with a resolution of  $2\pi \times 0.03 \text{ \AA}^{-1}$  and Methfessel-Paxton electronic smearing were adopted for the integration in the Brillouin zone for geometric optimization. The simulation was run with cutoff energy of 500 eV throughout the computations. These settings ensure convergence of the total energies to within 1 meV per atom. Structure relaxation proceeded until all forces on atoms were less than 1 meV  $\text{\AA}^{-1}$  and the total stress tensor was within 0.01 GPa of the target value. The climbing-image nudged elastic band (cNEB) method [*J. Chem. Phys.* 2000, 113, 9901] implemented in VASP was performed to investigate the transition state searches.

**Fabrication of PIC full cell:** PIC devices were also assembled in 2032 coin-type cells. Before assembling the PIC full cell, the C-WS<sub>2</sub>@CNFs anode was pre-cycled five times at 0.05 A g<sup>-1</sup> in half cell. PICs full cell was assembled by the pre-activated C-WS<sub>2</sub>@CNFs and ACNFs with mass ratios of 1:1, 1:2 and 1:3.

In PIC full-cell tests, the specific capacities and current densities were all based on the total mass of both anode and cathode materials. The calculations of energy density (E, Wh kg<sup>-1</sup>) and power densities (P, W kg<sup>-1</sup>) were performed using the equations

below:

$$E = \int_{t_1}^{t_2} IV dt = \Delta V \times \frac{I}{m} \times t \quad P = \frac{E}{t}$$

where  $\Delta V$  represents the potential change after full discharge,  $I$  is the constant discharge current, and  $m$  is the total mass of the anode and cathode materials,  $t$  is the time for a full discharge.

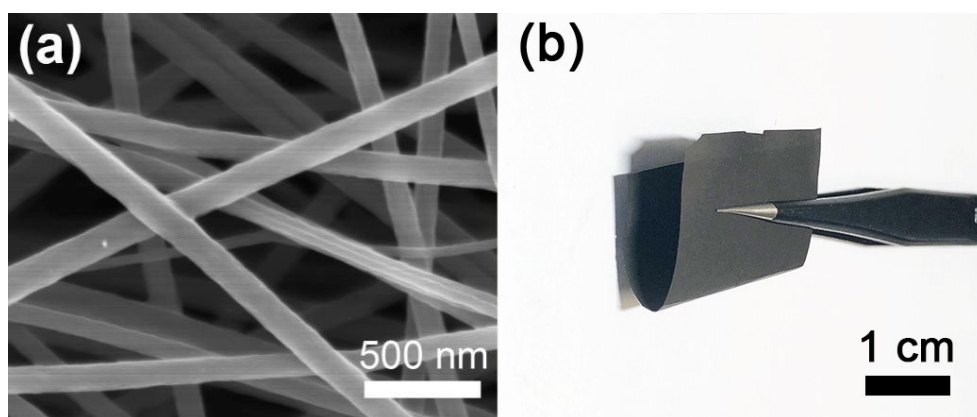

**Fig. S1** (a) SEM image and (b) photograph of the CNFs membrane.

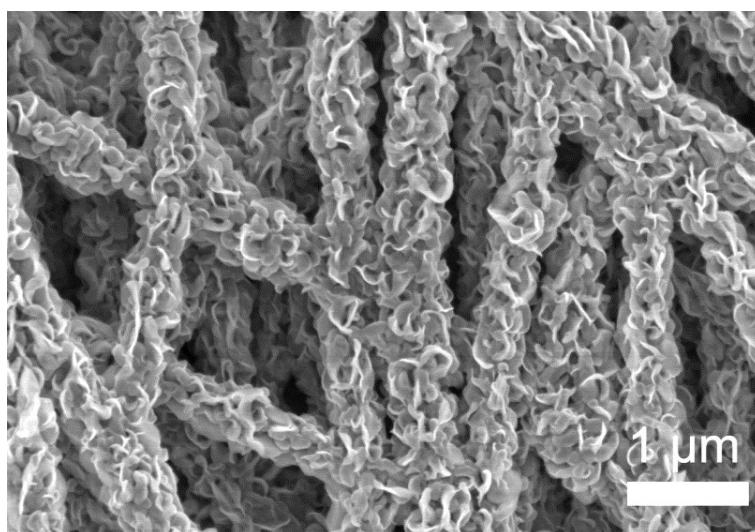

**Fig. S2** SEM image of the O-WS<sub>2</sub>@CNFs.

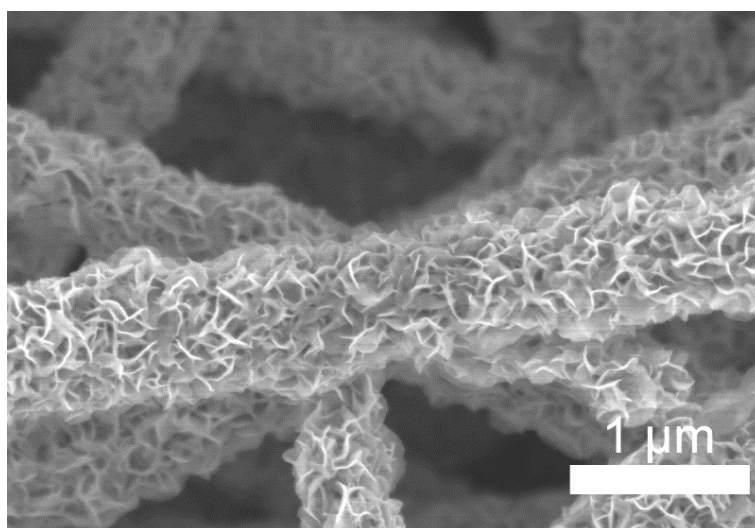

**Fig. S3** SEM image of the WS<sub>2</sub>@CNFs.

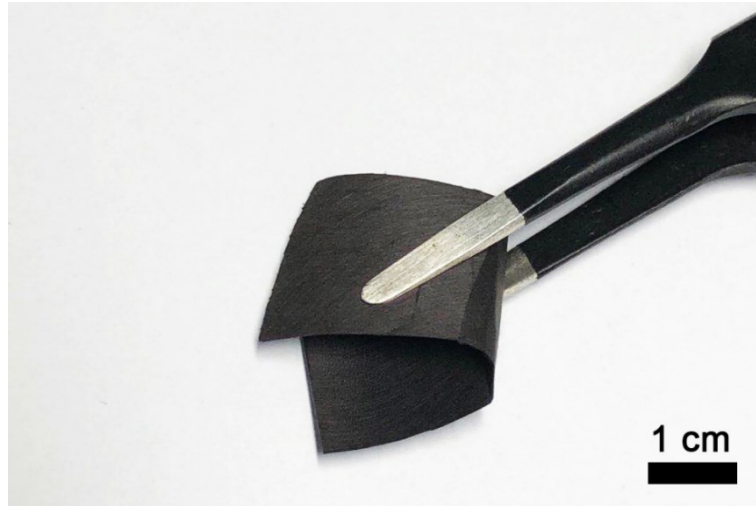

**Fig. S4** Photograph of the folded C-WS<sub>2</sub>@CNFs.

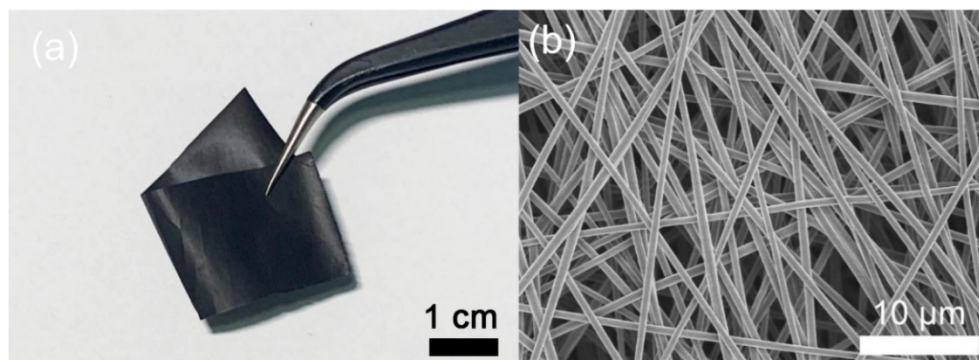

**Fig. S5** (a) Photograph of the folded ACNFs, and (b) SEM image of the ACNFs.



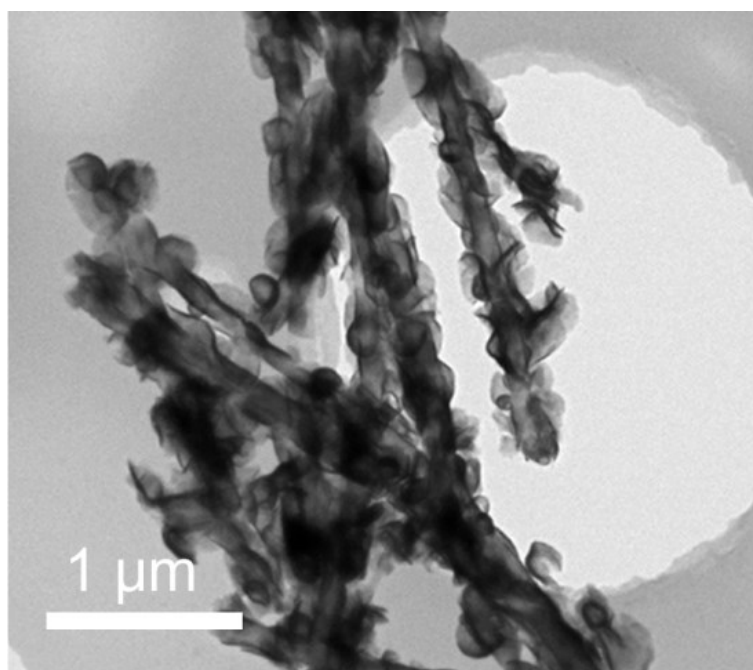

**Fig. S6** TEM image of the C-WS<sub>2</sub>@CNFs.

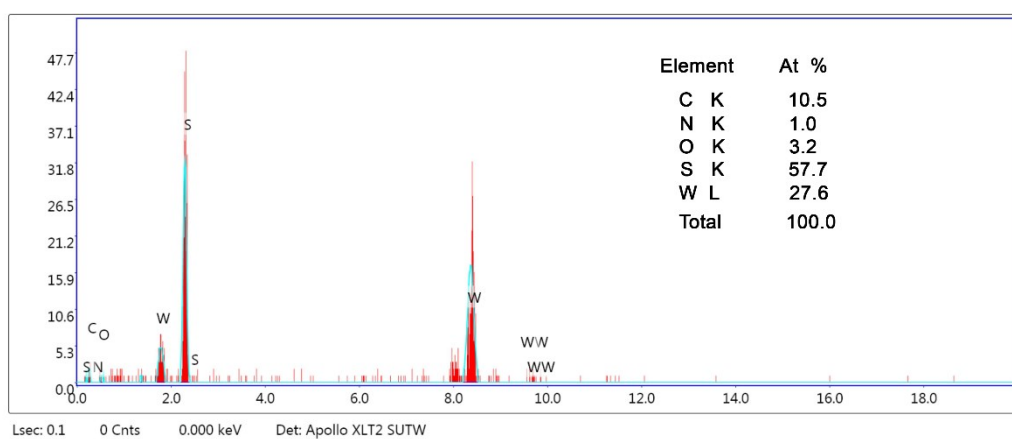

**Fig. S7** EDS spectrum of the WS<sub>2</sub>@CNFs.

**Table S1** Element compositions of the samples by XPS

| Element (at%)<br>Sample | W     | S     | C     | N    | O     |
|-------------------------|-------|-------|-------|------|-------|
| C-WS <sub>2</sub> @CNFs | 6.59  | 14.06 | 59.77 | 6.64 | 12.94 |
| WS <sub>2</sub> @CNFs   | 30.39 | 61.94 | 2.02  | 2.03 | 3.62  |
| O-WS <sub>2</sub> @CNFs | 11.70 | 13.78 | 27.70 | 7.55 | 39.27 |

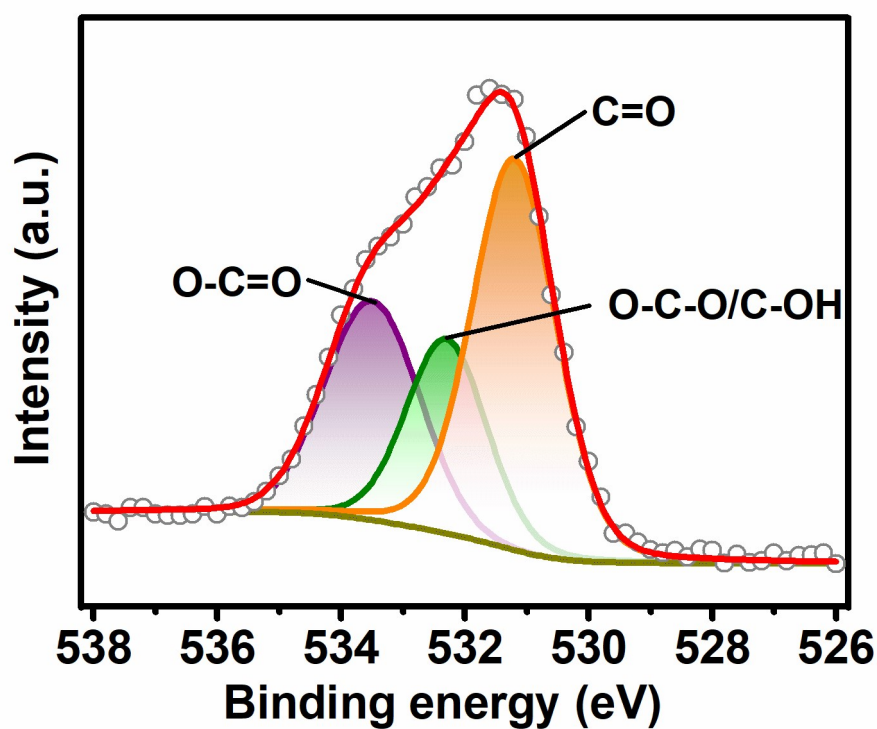

Fig. S8 The O 1s spectrum of C-WS<sub>2</sub>@CNFs

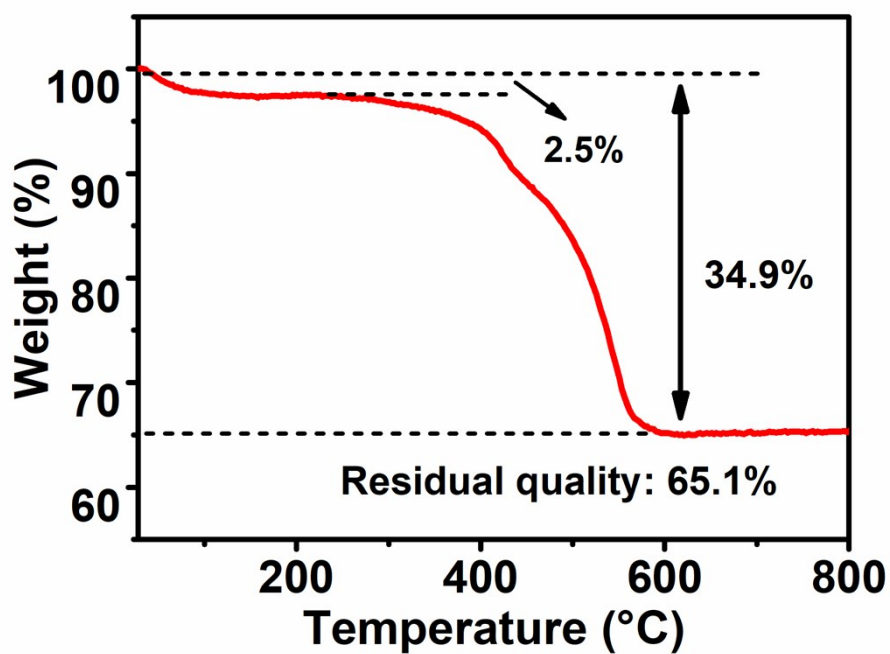

Fig. S9 TGA of C-WS<sub>2</sub>@CNFs.

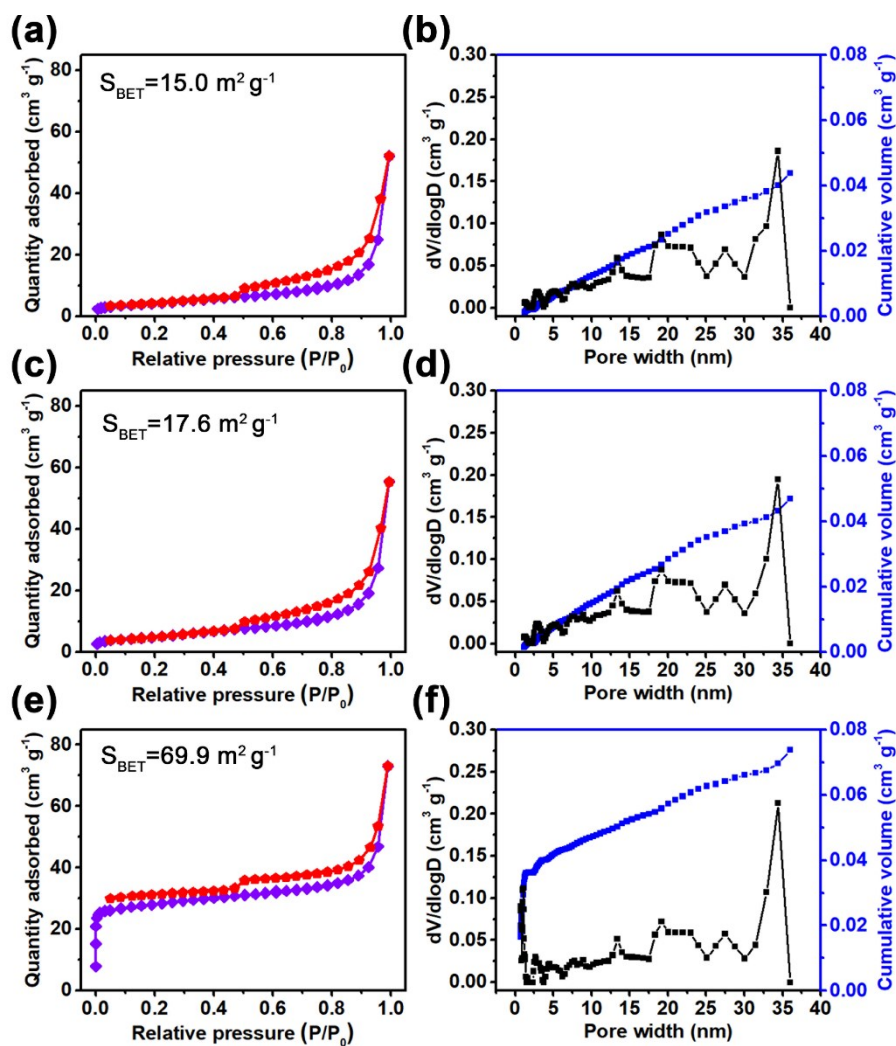

**Fig. S10** (a)  $\text{N}_2$  adsorption-desorption isotherm, and (b) pore size distribution of the  $\text{C-WS}_2@\text{CNFs}$ .

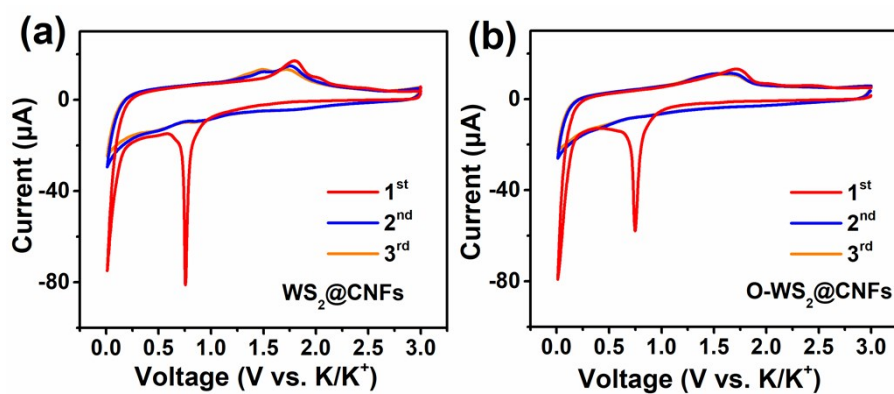

**Fig. S11** The initial three CV curves at  $0.2 \text{ mV s}^{-1}$  of (a)  $\text{WS}_2@\text{CNFs}$ , (b)  $\text{O-WS}_2@\text{CNFs}$ .

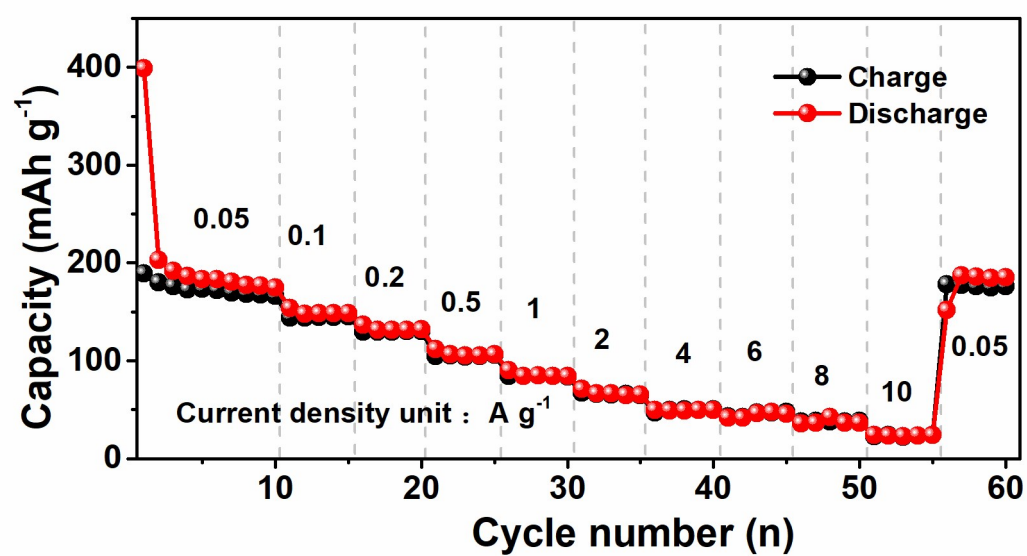

Fig. S12 Rate capabilities of the CNFs.

**Table S2** Comparison of the initial Coulombic efficiency of C-WS<sub>2</sub>@CNFs anode with previously reported anode materials for PIBs.

| Anode materials                | Current | Initial Coulombic | Reference                                         |
|--------------------------------|---------|-------------------|---------------------------------------------------|
| C-WS <sub>2</sub> @CNFs        | 0.05    | 68.6%             | This work                                         |
| ED-MoS <sub>2</sub>            | 0.1     | 40.9%             | Adv. Funct. Mater. <b>2020</b> , 1908755          |
| C/MoSe <sub>2</sub> /MXene     | 0.2     | 54.2%             | ACS Nano <b>2019</b> , 13, 3448–3456              |
| FeSe <sub>2</sub> /N-C         | 0.1     | 37%               | Adv. Energy Mater. <b>2019</b> , 1903277          |
| NbSe <sub>2</sub> /NSeCNFs     | 0.05    | 56.7%             | Adv. Funct. Mater. <b>2020</b> , 2004247          |
| SnO <sub>2</sub> Nanoparticles | 0.02    | 43.3%             | Energy Environ. Sci., <b>2020</b> , 13, 571–578   |
| N-doped Hollow Carbon          | 0.1     | 16.3%             | Energy Environ. Sci., <b>2019</b> , 12, 1605–1612 |
| Sulfur-Grafted Hollow Carbon   | 0.025   | 51.4%             | Adv. Mater. <b>2019</b> , 1900429                 |
| WS <sub>2</sub> @NCNs          | 0.05    | 48.8%             | Matter <b>2019</b> , 1, 893–910                   |

**Table S3** Comparison of the electrochemical performance of C-WS<sub>2</sub>@CNFs anode with previously reported anode materials for PIBs.

| Anode materials                       | Rate capability                                                                                                                                                                                   | Reference                                |
|---------------------------------------|---------------------------------------------------------------------------------------------------------------------------------------------------------------------------------------------------|------------------------------------------|
| C-WS <sub>2</sub> @CNFs               | 319 mAh g <sup>-1</sup> @0.05 A g <sup>-1</sup><br>234 mAh g <sup>-1</sup> @ 1 A g <sup>-1</sup><br>219 mAh g <sup>-1</sup> @2 A g <sup>-1</sup><br>168 mAh g <sup>-1</sup> @10 A g <sup>-1</sup> | This work                                |
| V <sub>2</sub> O <sub>3</sub> @PNCNFs | 245 mAh g <sup>-1</sup> @0.05 A g <sup>-1</sup><br>138 mAh g <sup>-1</sup> @1 A g <sup>-1</sup>                                                                                                   | Nano Energy <b>2018</b> , 50, 462-467    |
| VSe <sub>2</sub> NSs                  | 374 mAh g <sup>-1</sup> @0.1 A g <sup>-1</sup><br>180 mAh g <sup>-1</sup> @1 A g <sup>-1</sup>                                                                                                    | Adv. Mater. <b>2018</b> , 1800036        |
| S-HCS                                 | 389 mAh g <sup>-1</sup> @0.1 A g <sup>-1</sup><br>108 mAh g <sup>-1</sup> @ 5A g <sup>-1</sup>                                                                                                    | Adv. Mater. <b>2019</b> , 1900429        |
| MoSe <sub>2</sub> /N-C                | 303 mAh g <sup>-1</sup> @0.1 A g <sup>-1</sup><br>178 mAh g <sup>-1</sup> @2 A g <sup>-1</sup>                                                                                                    | Adv. Energy Mater. <b>2018</b> , 1801477 |
| MoS <sub>2</sub> @rGO                 | 399 mAh g <sup>-1</sup> @0.1 A g <sup>-1</sup><br>195 mAh g <sup>-1</sup> @2 A g <sup>-1</sup>                                                                                                    | Nano Energy <b>2019</b> , 63, 103868     |
| NbSe <sub>2</sub> /rGO                | 281 mAh g <sup>-1</sup> @0.05 A g <sup>-1</sup><br>81 mAh g <sup>-1</sup> @2A g <sup>-1</sup>                                                                                                     | Adv. Funct. Mater. <b>2020</b> , 2004247 |
| VS <sub>2</sub> NSA                   | 412 mAh g <sup>-1</sup> @0.1A g <sup>-1</sup><br>101 mAh g <sup>-1</sup> @2A g <sup>-1</sup>                                                                                                      | Adv. Mater. <b>2017</b> , 1702061        |
| FeSe <sub>2</sub> /N-C                | 291 mAh g <sup>-1</sup> @0.1 A g <sup>-1</sup><br>151 mAh g <sup>-1</sup> @ 2A g <sup>-1</sup>                                                                                                    | Adv. Energy Mater. <b>2019</b> , 1903277 |
| WS <sub>2</sub> powder                | 115 mAh g <sup>-1</sup> @0.05 A g <sup>-1</sup><br>62 mAh g <sup>-1</sup> @0.8 A g <sup>-1</sup>                                                                                                  | Nano Res. <b>2019</b> , 1998-0124        |
| WS <sub>2</sub> @NCNs                 | 415 mAh g <sup>-1</sup> @0.05 A g <sup>-1</sup><br>198 mAh g <sup>-1</sup> @1A g <sup>-1</sup>                                                                                                    | Matter <b>2019</b> , 1, 893–910          |

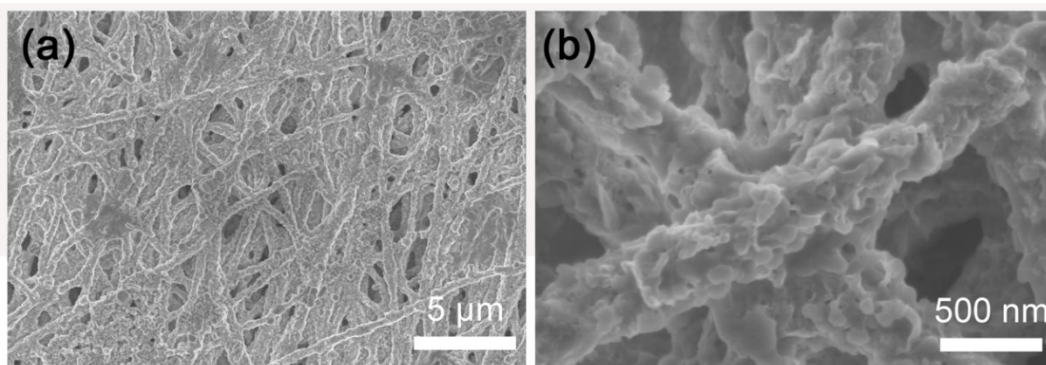

**Fig. S13** (a, b) SEM of the C-WS<sub>2</sub>@CNFs electrode after the 300 cycles.

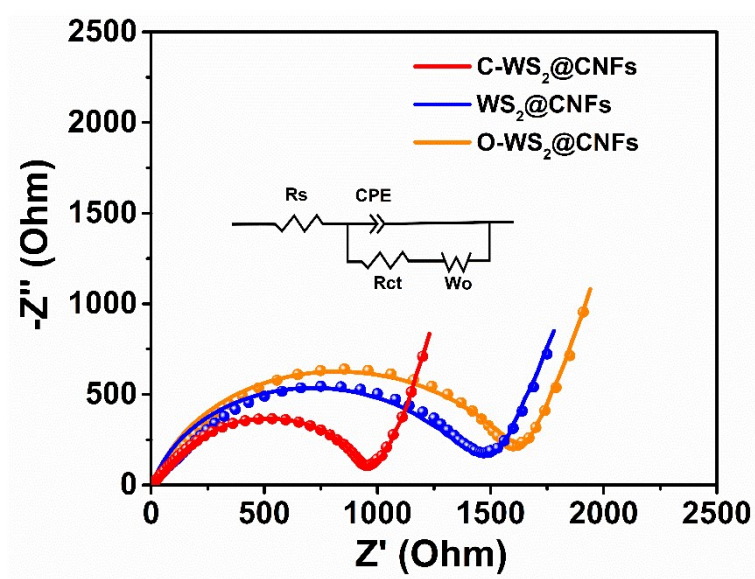

**Fig. S14** Electrochemical impedance spectroscopy (EIS) and the data fitting results of C-WS<sub>2</sub>@CNFs, WS<sub>2</sub>@CNFs, and O-WS<sub>2</sub>@CNFs. The inset shows the corresponding equivalent circuit used for the data fitting, where  $R_s$ ,  $R_{ct}$ , CPE, and  $W_o$  represent contact resistance, charge-transfer resistance, constant-phase element, and Warburg ion-diffusion resistance, respectively.

**Table S4** The resistor elements of three samples derived from the Nyquist plots.

| Sample                  | $R_s$ ( $\Omega$ ) | $R_{ct}$ ( $\Omega$ ) | $W_O$ ( $\Omega$ ) |
|-------------------------|--------------------|-----------------------|--------------------|
| C-WS <sub>2</sub> @CNFs | 3.9                | 917                   | 169                |
| WS <sub>2</sub> @CNFs   | 5.3                | 1361                  | 451                |
| O-WS <sub>2</sub> @CNFs | 5.2                | 1567                  | 183                |

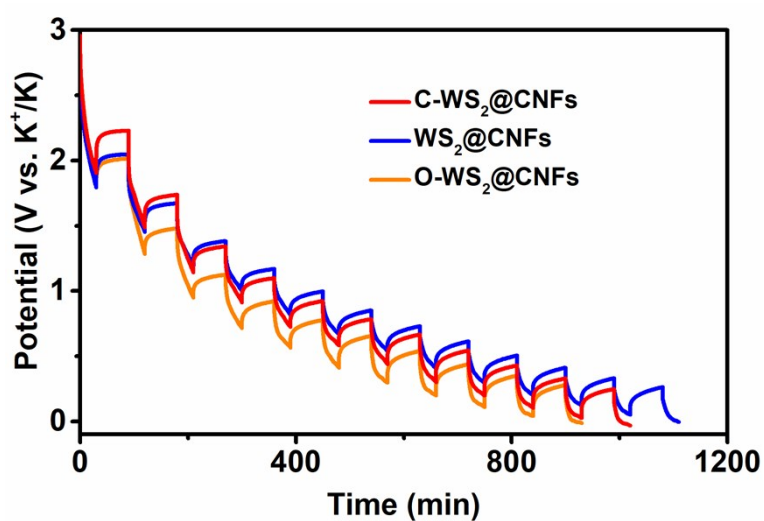

**Fig. S15** GITT profiles of the discharging process of the three electrodes.

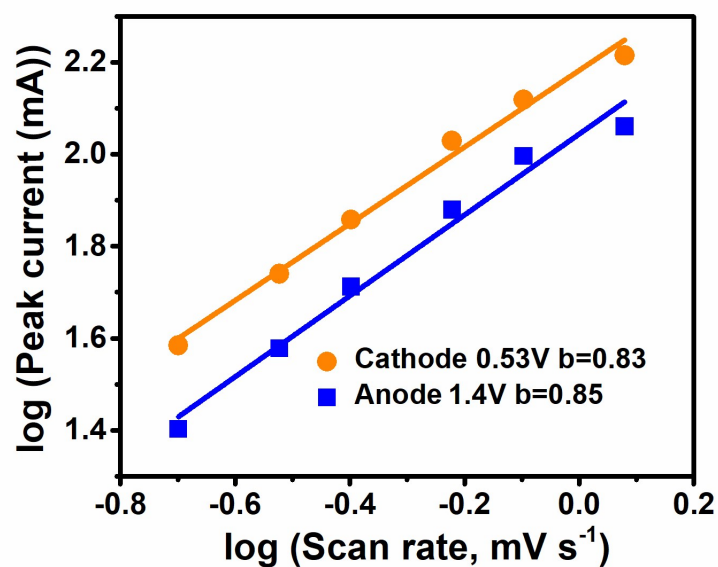

**Fig. S16** Determination of the b-value according to the relationship between peak current and scan rate.



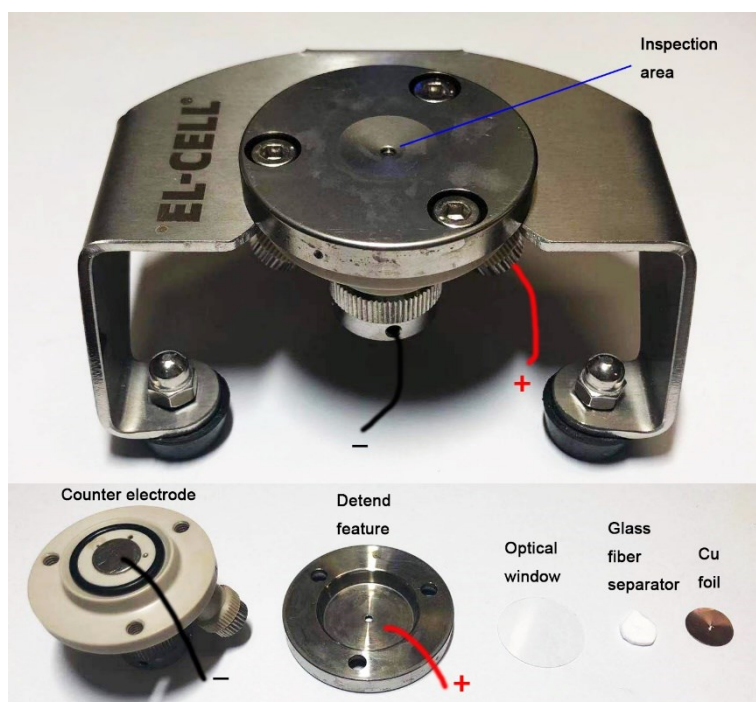

**Fig. S17** The ECC-Opto-Std test cell and its parts for the *in situ* Raman spectra testing.

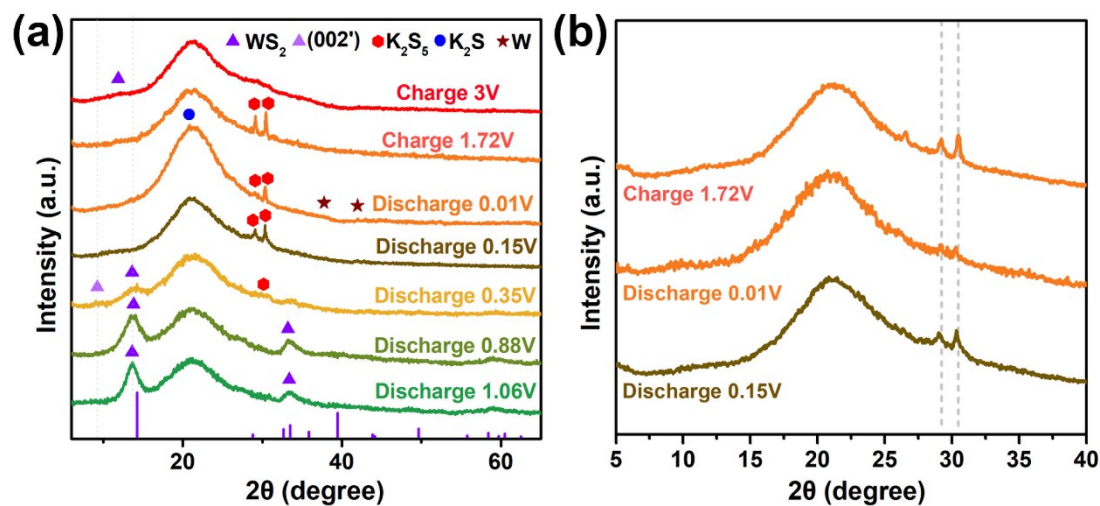

**Fig. S18** (a) *Ex situ* XRD patterns of C-WS<sub>2</sub>@CNFs (a) the 1<sup>st</sup> discharge-charge process, (b) the 3<sup>rd</sup> discharge-charge process

The phase transition of C-WS<sub>2</sub>@CNFs was further identified by *ex situ* XRD at different discharge/charge states (Fig. S18). When the C-WS<sub>2</sub>@CNFs electrode is

discharged from 1.04 to 0.88 V, the peaks of the pristine WS<sub>2</sub> are still found and remained essentially unchanged. Upon further potassiation at 0.35 V, the predominant (002) Bragg peak at 14.1° weakens, while a new peak named (002') is collected at 9.8° corresponding to enlarged interlayer space of 0.790 nm. These changes further confirm the formation of K<sup>+</sup>-intercalated WS<sub>2</sub> (K<sub>x</sub>WS<sub>2</sub>). After the electrode is discharged to 0.15 V, the intermediate phase of K<sub>2</sub>S<sub>5</sub> (JCPDS No. 30-0993) is identified, demonstrating the continuation of the conversion reactions. As the potassiation continues to 0.01 V, the K<sub>2</sub>S<sub>5</sub> signal gradually fades, accompanied by the appearance of a peak at 20.84° corresponding to the (111) plane of cubic K<sub>2</sub>S (JCPDS No. 74-1030). Two small peaks appear around 37.7° and 42.0°, which are indexed to the (111) and (200) planes of W (JCPDS No. 88-2339). Upon depotassiation at 1.72 V, the peak of the K<sub>2</sub>S<sub>5</sub> phase reappears. When fully charged to 0.01 V, a faint WS<sub>2</sub> peak with slight shift compared to that of pristine WS<sub>2</sub> is detected, indicating the irreversible structural degradation of WS<sub>2</sub> caused by the phase conversion during the charge/discharge cycle. This intermediate phase of K<sub>2</sub>S<sub>5</sub> could be also identified by the ex situ XRD measurement for the 3<sup>rd</sup> discharge/charge cycle (Fig. S18b). In detail, the intermediate phase of K<sub>2</sub>S<sub>5</sub> can be determined when the electrode is discharged to 0.15 V according to the two diffraction peaks at 2θ = 29.1° and 30.4° (JCPDS No. 30-0993). These peaks significantly became weak when it was further discharge to 0.01 V, and reappeared when it was re-charged to 1.72 V. These results further confirm the well reproducibility of the intermediate phase of K<sub>2</sub>S<sub>5</sub> and the conversion reaction mechanism between K<sup>+</sup> and WS<sub>2</sub>.

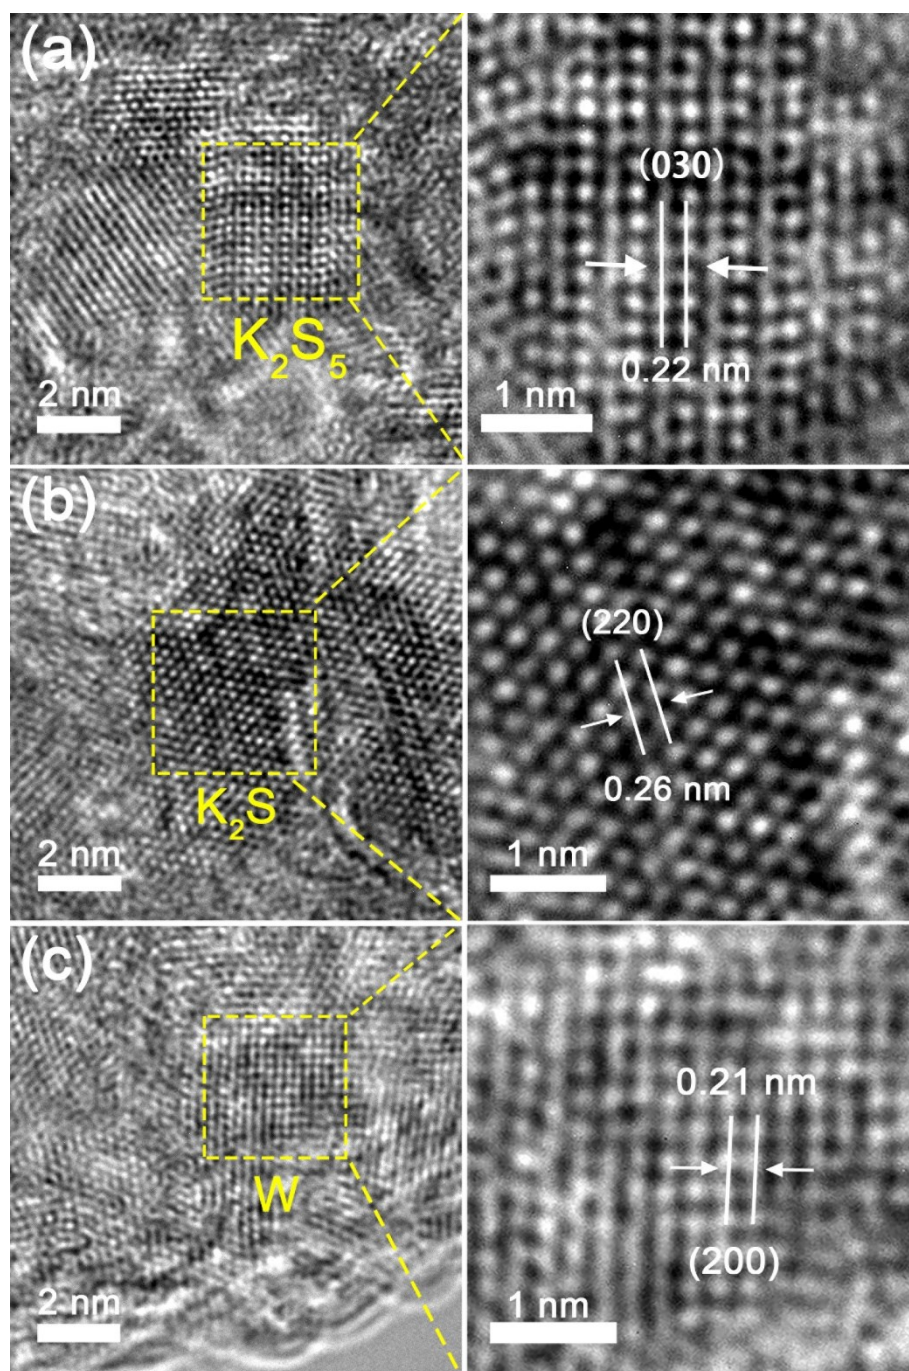

**Fig. S19** *Ex situ* HRTEM images of C-WS<sub>2</sub>@CNFs at discharged to 0.01 V: (a) K<sub>2</sub>S<sub>5</sub>, (b) K<sub>2</sub>S, and (c) W.

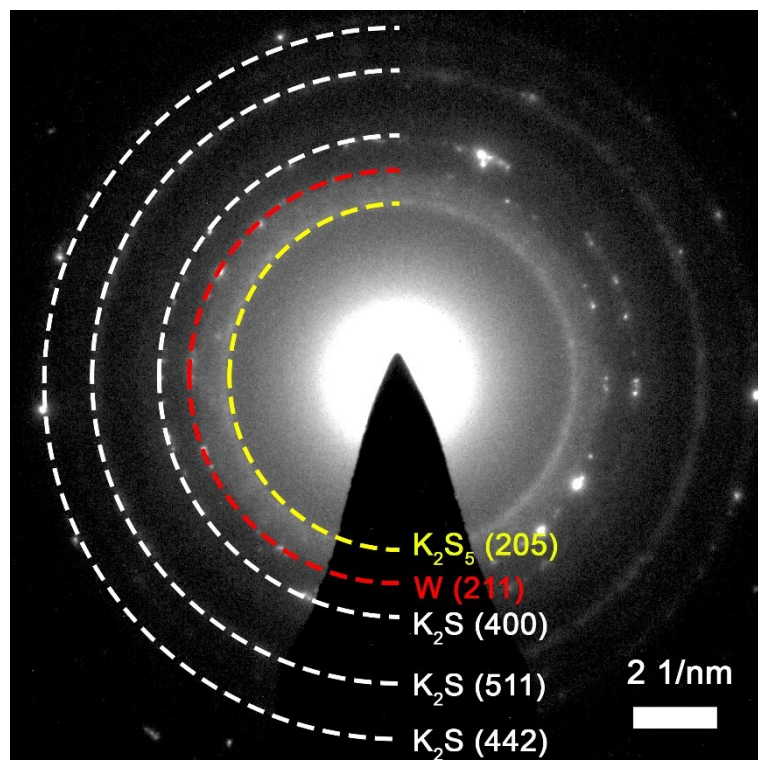

**Fig. S20** SAED pattern of the discharged C-WS<sub>2</sub>@CNFs electrode.

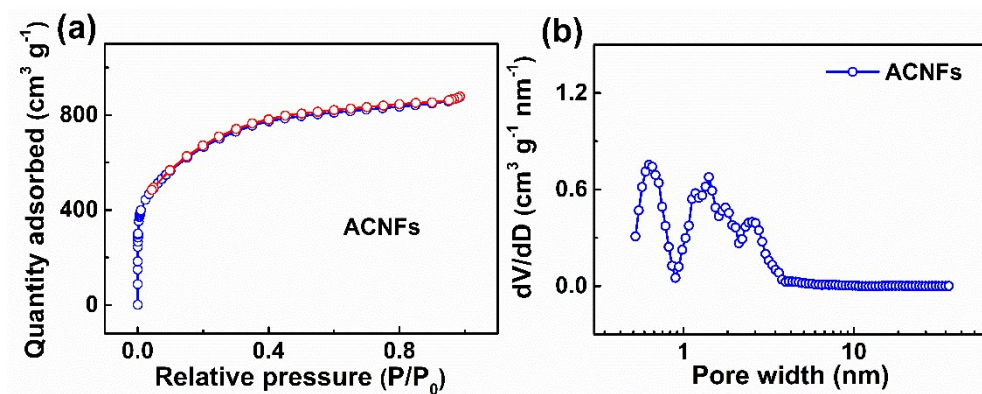

**Fig. S21** (a) Nitrogen adsorption-desorption isothermal curves and b) pore size distribution of ACNFs.



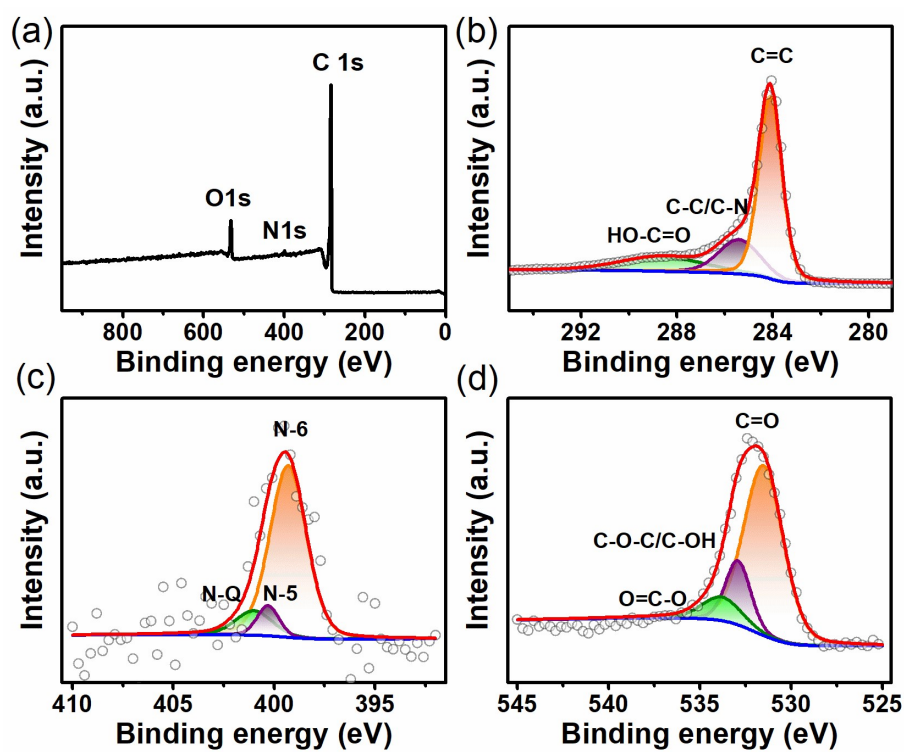

**Fig. S22** (a) XPS survey, high-resolution XPS spectra of (b) C1s, (c) N1s, and (d) O1s of ACNFs.

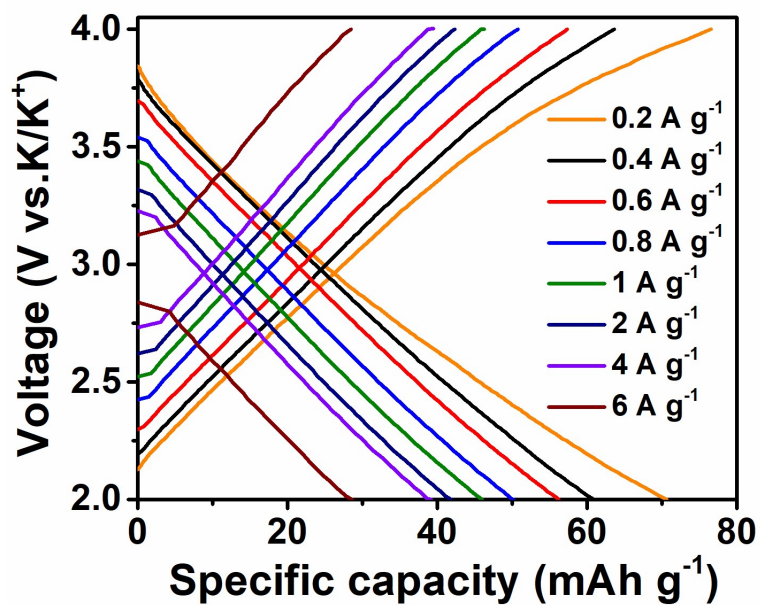

**Fig. S23** Charge/discharge plots at different current densities of ACNFs.

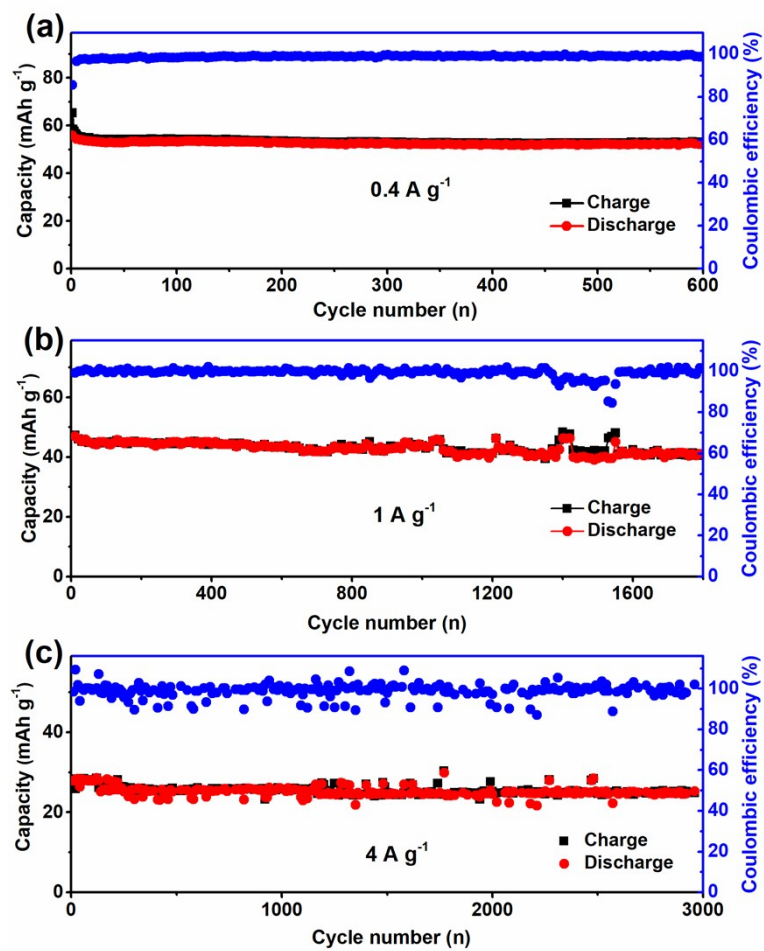

**Fig. S24** Cycle performance of ACNFs at different current densities.

**Table S5** Comparison of the C-WS<sub>2</sub>@CNFs||ACNFs with previously reported PICs.

| PICs                                     | Rate capability                                                                                                 | Reference                                   |
|------------------------------------------|-----------------------------------------------------------------------------------------------------------------|---------------------------------------------|
| C-WS <sub>2</sub> @CNFs  ACNFs           | <b>180.4 Wh kg<sup>-1</sup>@399.6 W kg<sup>-1</sup></b><br><b>42 Wh kg<sup>-1</sup>@12.6 kW kg<sup>-1</sup></b> | <b>This work</b>                            |
| S-N-PCNs  AC                             | 170.3 Wh kg <sup>-1</sup> @196.7 W kg <sup>-1</sup><br>79.8 Wh kg <sup>-1</sup> @ 5.4 kW kg <sup>-1</sup>       | Adv. Energy Mater.<br><b>2019</b> , 1901533 |
| NbSe <sub>2</sub> /NSeCNFs  AC           | 136.2 Wh kg <sup>-1</sup> @182.0 W kg <sup>-1</sup><br>18.6 Wh kg <sup>-1</sup> @ 4.1 kW kg <sup>-1</sup>       | Adv. Funct. Mater.<br><b>2020</b> , 2004247 |
| FeSe <sub>2</sub> /N-C  AC               | 232.2 Wh kg <sup>-1</sup> @198.1 W kg <sup>-1</sup><br>29.9 Wh kg <sup>-1</sup> @ 7.5 kW kg <sup>-1</sup>       | Adv. Energy Mater.<br><b>2019</b> , 1903277 |
| CTP  AC                                  | 76.2 Wh kg <sup>-1</sup> @126.3 W kg <sup>-1</sup><br>47.0 Wh kg <sup>-1</sup> @ 1.8 kW kg <sup>-1</sup>        | Adv. Funct. Mater.<br><b>2018</b> , 1802684 |
| NHCS  ANHCS                              | 109.5 Wh kg <sup>-1</sup> @189.2 W kg <sup>-1</sup><br>18.4 Wh kg <sup>-1</sup> @ 8.3 kW kg <sup>-1</sup>       | Adv. Funct. Mater.<br><b>2019</b> , 1903496 |
| N-MoSe <sub>2</sub> /G  AC               | 103.0 Wh kg <sup>-1</sup> @209.9 W kg <sup>-1</sup><br>31.2 Wh kg <sup>-1</sup> @ 6.8 kW kg <sup>-1</sup>       | Adv. Funct. Mater.<br><b>2019</b> , 1903878 |
| K <sub>2</sub> TP  AC                    | 84.0 Wh kg <sup>-1</sup> @209.9 W kg <sup>-1</sup><br>51.2 Wh kg <sup>-1</sup> @ 2.0 kW kg <sup>-1</sup>        | Chem. Sci., <b>2019</b> ,<br>10, 2048       |
| Soft carbon  AC                          | 92.6 Wh kg <sup>-1</sup> @197.0 W kg <sup>-1</sup><br>13.8 Wh kg <sup>-1</sup> @ 0.6 kW kg <sup>-1</sup>        | Adv. Mater. <b>2018</b> ,<br>1800804        |
| 3D-Ti <sub>3</sub> C <sub>2</sub>   HPAC | 98.4 Wh kg <sup>-1</sup> @120.8 W kg <sup>-1</sup><br>18.7 Wh kg <sup>-1</sup> @ 7.0 kW kg <sup>-1</sup>        | Adv. Funct. Mater.<br><b>2020</b> , 2005663 |
| MDPC  PDPC                               | 120.0 Wh kg <sup>-1</sup> @260 W kg <sup>-1</sup><br>21.7 Wh kg <sup>-1</sup> @ 26 kW kg <sup>-1</sup>          | Adv. Funct. Mater.<br><b>2020</b> , 2006561 |
| S-MCCF  aMCCF                            | 100 Wh kg <sup>-1</sup> @200 W kg <sup>-1</sup><br>58.3 Wh kg <sup>-1</sup> @ 10 kW kg <sup>-1</sup>            | Nano-Micro Lett.<br><b>2021</b> , 13:14     |
| WS <sub>2</sub> @NCNs  NCHS              | 103.7 Wh kg <sup>-1</sup> @235.5 W kg <sup>-1</sup><br>66.4 Wh kg <sup>-1</sup> @ 2.3 kW kg <sup>-1</sup>       | Matter <b>2019</b> , 1,<br>893–910          |
